# Supplementary material
Source: Springer Nature journal article supplement (https://www.springermedizin.de/resource/supplementary/13054_2010_8503_MOESM4_ESM.pdf/9732124)

**(a)**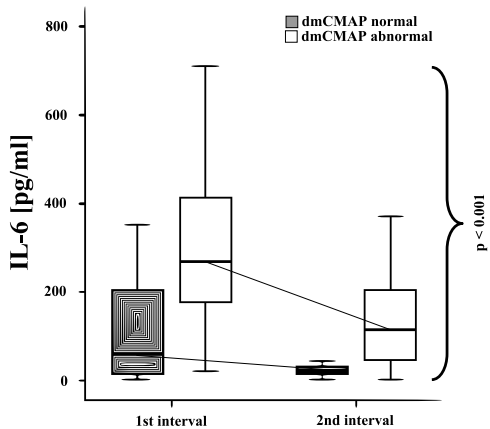**(b)**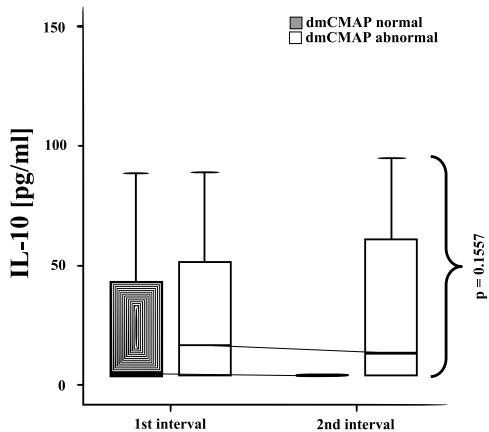

Supplement: MOESM4 [file 9732124]
